# Supplementary material for: FOXO1 regulates expression of a microRNA cluster on X chromosome
Source: PubMed Central journal article supplement (PMC3701110; doi:10.18632/aging.100558), 2013-05-12

**Supplementary Table S1. Predicted pathways and genes targeted by the FOXO1-responsive miRNAs.**

| KEGG Pathway                                     | Pathway ID | all miR combined | miR-506 | miR-507 | miR-508 | miR-513a | miR-513b | miR-513c | Predicted individual targets (all miRNA combined)                                                                                                                                                                                                                           |
|--------------------------------------------------|------------|------------------|---------|---------|---------|----------|----------|----------|-----------------------------------------------------------------------------------------------------------------------------------------------------------------------------------------------------------------------------------------------------------------------------|
| Axon guidance                                    | hsa04360   |                  |         |         |         |          |          |          | EFNB2, SRGAP3, SEMA6A, EPHA3, NCK2, GNAI2, SLIT1, ABLIM3, CXCL12, ITGB1, SEMA6C, PLXNB2, LRRRC4C, MET, GNAI3, SEMA6D, SRGAP2, ROCK1, KRAS, SEMA6B, NRP1, PAK1, MAPK1, NFATC1, PAK6, SEMA4G, PPP3CA, EPHA8, PLXNA3, SEMA5A, EFN3, NFAT5, EFN1                                |
| Colorectal cancer                                | hsa05210   |                  |         |         |         |          |          |          | PIK3CA, RALGDS, AXIN1, LEF1, DVL3, PDGFRA, FZD5, TGFBR1, IGF1R, MET, SOS2, FZD8, KRAS, SMAD2, CYCS, FZD3, SOS1, APC, MAPK1, GRB2, AKT, FZD4, PIK3R3, SMAD4                                                                                                                  |
| Chronic myeloid leukemia                         | hsa05220   |                  |         |         |         |          |          |          | PIK3CA, E2F3, EVI1, TGFBR1, NFKB1, SOS2, KRAS, STAT5B, CBL, SOS1, PTPN11, SHC1, MAPK1, RUNX1, GRB2, AKT, SHC4, PIK3R3, BCL2L1, CTBP2, SMAD4                                                                                                                                 |
| TGF-beta signaling pathway                       | hsa04350   |                  |         |         |         |          |          |          | E2F5, TGFBR1, DOCK5, ID2, BMP6, ROCK1, SMURF1, SMAD7, SMAD2, RBL1, SMAD5, ACVR2A, GDF6, MAPK1, PPP2R2C, THBS2, PPP2CA, ACVR2B, BMPR1B, SP1, BMP4, RPS6KB1, SMAD4                                                                                                            |
| Dorso-ventral axis formation                     | hsa04320   |                  |         |         |         |          |          |          | NOTCH2, SPIRE1, SOS2, KRAS, SOS1, MAPK1, GRB2, ETS2, ERBB4, ETS1                                                                                                                                                                                                            |
| ErbB signaling pathway                           | hsa04012   |                  |         |         |         |          |          |          | CAMK2D, NCK2, PIK3CA, SOS2, KRAS, STAT5B, CBL, MAP2K4, SOS1, PAK1, SHC1, MAPK1, SRC, ABL2, GRB2, PAK6, MAP2K7, AKT, ERBB4, SHC4, RPS6KB1, PIK3R3                                                                                                                            |
| Insulin signaling pathway                        | hsa04910   |                  |         |         |         |          |          |          | IRS2, PRKAG2, PIK3CA, PTPN1, PPP1R3B, TSC1, LIPE, SOS2, KRAS, CBL, GYS1, SREBF1, PRKAA2, FLOT2, SOS1, SOCS2, FOXO1, SHC1, MAPK1, PHKB, GRB2, SOCS3, FLOT1, AKT2, PHKA1, SHC4, RPS6KB1, PIK3R3, PPP1R3D                                                                      |
| Acute myeloid leukemia                           | hsa05221   |                  |         |         |         |          |          |          | PIK3CA, LEF1, STAT3, NFKB1, PIM1, SOS2, KRAS, PML, SOS1, MAPK1, RUNX1, GRB2, AKT2, RPS6KB1, PIK3R3                                                                                                                                                                          |
| Adherens junction                                | hsa04520   |                  |         |         |         |          |          |          | PTPN11, LEF1, TGFBR1, IGF1R, MET, WASF3, WASL, SMAD2, CTNNA2, MAPK1, PTPRJ, SRC, PVRL2, SSX2IP, ACTN4, IQGAP1, SMAD4, SNAI2                                                                                                                                                 |
| Benzoate degradation via CoA ligation            | hsa00632   |                  |         |         |         |          |          |          | SH3GLB1, DHRS1, MYST3, ESCO1, YOD1, GCDH, LYCAT, HADHA, MYST4                                                                                                                                                                                                               |
| mTOR signaling pathway                           | hsa04150   |                  |         |         |         |          |          |          | PIK3CA, RPS6KA1, PGF, TSC1, FIGF, PRKAA2, MAPK1, ULK2, AKT2, RPS6KA3, IGF1, RPS6KB1, PIK3R3                                                                                                                                                                                 |
| Epithelial cell signaling in Helicobacter pylori | hsa05120   |                  |         |         |         |          |          |          | PTPRZ1, ATP6V1C1, NFKB1, MET, ATP6V0E1, MAP2K4, ATP6V1C2, PTPN11, PAK1, SRC, ADAM17, ATP6V1A, ATP6V1B2, ATP6V0A2, MAPK14, ATP6V0D2                                                                                                                                          |
| Focal adhesion                                   | hsa04510   |                  |         |         |         |          |          |          | ITGA3, COL6A3, PIK3CA, VASP, PGF, ITGB1, PDGFRA, IGF1R, CAPN2, MET, DIAPH1, FIGF, ROCK1, SOS2, ITGB8, SOS1, PAK1, SHC1, MAPK1, TLN1, SRC, GRB2, PAK6, THBS2, CAV1, ITGB3, AKT2, ITGAV, ACTN4, CCND2, LAMC1, IGF1, ITGA7, SHC4, PIK3R3, COL4A1                               |
| Regulation of actin cytoskeleton                 | hsa04810   |                  |         |         |         |          |          |          | ITGA3, MYH9, PIK3CA, ITGB1, PDGFRA, IQGAP2, DIAPH1, SSH2, CYFIP2, ROCK1, PPP1R12B, WASL, SOS2, ITGB8, KRAS, ARPC1B, SOS1, FGF9, ARHGEF1, PAK1, APC, MAPK1, FGF7, DIAPH2, ARHGEF4, PIP4K2C, PAK6, ITGB3, ITGAV, ACTN4, GSN, PIP5K3, MYH10, RRAS, ITGA7, PIK3R3, IQGAP1, PFN2 |
| Ubiquitin mediated proteolysis                   | hsa04120   |                  |         |         |         |          |          |          | UBE2G2, UBE2G1, UBE4A, UBE3A, UBE2NL, UBE2R2, MAP3K1, CUL3, SMURF1, WWP2, UBE2W, CBL, MID1, PML, UBE2B, UBE2L3, UBE2N, FBXW7, WWP1, FBXW11, TRIP12, SOCS3, PIAS3, UBE2O, CUL5, UBE2H                                                                                        |
| Wnt signaling pathway                            | hsa04310   |                  |         |         |         |          |          |          | CAMK2D, DAAM2, AXIN1, LEF1, DVL3, FZD5, DOCK5, LRP6, CSNK1A1L, ROCK1, FZD8, SMAD2, FZD3, APC, VANGL1, PPP2R2C, FBXW11, NFATC1, PPP2CA, PPP3CA, PLCB1, CCND2, SFRP5, FZD4, NFAT5, PRICKLE2, CTBP2, SMAD4                                                                     |
| Antigen processing and presentation              | hsa04612   |                  |         |         |         |          |          |          | NYFB                                                                                                                                                                                                                                                                        |

|                                              |          |  |  |  |  |  |  |  |                                                                                                                                                                                     |
|----------------------------------------------|----------|--|--|--|--|--|--|--|-------------------------------------------------------------------------------------------------------------------------------------------------------------------------------------|
| Glioma                                       | hsa05214 |  |  |  |  |  |  |  | CAMK2D, PIK3CA, E2F3, PDGFRA, IGF1R, SOS2, KRAS, SOS1, SHC1, MAPK1, GRB2, AKT2, IGF1, SHC4, PIK3R3                                                                                  |
| Endometrial cancer                           | hsa05213 |  |  |  |  |  |  |  | PIK3CA, AXIN1, LEF1, FOXO3, SOS2, KRAS, SOS1, CTNNA2, APC, MAPK1, GRB2, AKT2, PIK3R3                                                                                                |
| Tight junction                               | hsa04530 |  |  |  |  |  |  |  | MYH9, GNAI2, TJP2, PRKCO, DOCK5, GNAI3, VAPA, KRAS, PRKCE, PPP2R3A, CLDN11, CTNNA2, EXOC4, ASH1L, PPP2R2C, AMOTL1, SRC, MYH11, PPP2CA, PARD6B, AKT2, CGN, ACTN4, TJAP1, MYH10, RRAS |
| Cytokine-cytokine receptor interaction       | hsa04060 |  |  |  |  |  |  |  | IL2RG, TNFSF4, CXCL12, TNFSF15, PDGFRA, EDA, TGFBR1, MET, LIFR, CXCL5, ACVR2A, GHR, ACVR2B, TNFRSF19, BMPR1B, IL11, IL6R                                                            |
| Complement and coagulation cascades          | hsa04610 |  |  |  |  |  |  |  | CD55                                                                                                                                                                                |
| Non-small cell lung cancer                   | hsa05223 |  |  |  |  |  |  |  | PIK3CA, RASSF5, E2F3, FOXO3, SOS2, KRAS, STK4, SOS1, MAPK1, GRB2, AKT2, PIK3R3, RXRA                                                                                                |
| Pancreatic cancer                            | hsa05212 |  |  |  |  |  |  |  | PIK3CA, RALGDS, RALBP1, E2F3, PGF, STAT3, TGFBR1, NFKB1, FIGF, KRAS, SMAD2, MAPK1, AKT2, PIK3R3, BCL2L1, SMAD4                                                                      |
| Glycolysis / Gluconeogenesis                 | hsa00010 |  |  |  |  |  |  |  | PGM1                                                                                                                                                                                |
| Cell Communication                           | hsa01430 |  |  |  |  |  |  |  | COL6A3, DSC2, VIM, KRT12, THBS2, LAMC1, COL4A1                                                                                                                                      |
| Limonene and pinene degradation              | hsa00903 |  |  |  |  |  |  |  | SH3GLB1, DHRS1, MYST3, ESCO1, YOD1, LYCAT, HADHA, MYST4                                                                                                                             |
| Renal cell carcinoma                         | hsa05211 |  |  |  |  |  |  |  | PIK3CA, PGF, MET, FIGF, SOS2, KRAS, SOS1, PTPN11, PAK1, MAPK1, GRB2, PAK6, AKT2, ETS1, PIK3R3                                                                                       |
| Metabolism of xenobiotics by cytochrome P450 | hsa00980 |  |  |  |  |  |  |  | GSTK1                                                                                                                                                                               |
| Polyunsaturated fatty acid biosynthesis      | hsa01040 |  |  |  |  |  |  |  | SCD, ACOX1, ELOVL5, YOD1, PECR, HADHA                                                                                                                                               |
| Oxidative phosphorylation                    | hsa00190 |  |  |  |  |  |  |  | ATP6V1C1, ATP6V0E1, ATP6V1C2, ATP6V1A, ATP6V1B2, ATP6V0A2, ATP6V0D2                                                                                                                 |
| T cell receptor signaling pathway            | hsa04660 |  |  |  |  |  |  |  | NCK2, PIK3CA, PRKCO, NFKB1, SOS2, KRAS, CBL, SOS1, PAK1, NFATC1, GRB2, PAK6, PPP3CA, AKT2, NFAT5, CD28, PIK3R3                                                                      |
| Adipocytokine signaling pathway              | hsa04920 |  |  |  |  |  |  |  | IRS2, PRKAG2, STAT3, PRKCO, ACSL1, NFKB1, PRKAA2, ACSL3, ADIPOR2, PTPN11, SOCS3, AKT2, RXRA, PPARA                                                                                  |
| Glycan structures - biosynthesis 1           | hsa01030 |  |  |  |  |  |  |  | NDST1, CHST14, ST3GAL3, GALNT13, C1GALT1, MAN1A1, HS6ST3, ALG9, CHST1, GALNT9, GALNT10, MGAT4A, GCNT1, EXTL2, B4GALT5, EXTL3, GALNT12, ALG2, CHSY1, B4GALT1, XYLT1                  |
| Small cell lung cancer                       | hsa05222 |  |  |  |  |  |  |  | ITGA3, TRAF4, PIK3CA, E2F3, ITGB1, NFKB1, CYCS, PTGS2, AKT2, ITGAV, PIAS3, LAMC1, PIK3R3, BCL2L1, COL4A1, RXRA                                                                      |
| GnRH signaling pathway                       | hsa04912 |  |  |  |  |  |  |  | CAMK2D, ADCY1, MAP3K1, SOS2, KRAS, MAP2K4, SOS1, ITPR3, MAP3K3, MAPK1, SRC, MAPK7, GRB2, ADCY9, MAP2K7, MAPK14, PLCB1                                                               |
| Heparan sulfate biosynthesis                 | hsa00534 |  |  |  |  |  |  |  | NDST1, HS6ST3, GLCE, EXTL2, EXTL3                                                                                                                                                   |
| Dentatorubropallidolusian atrophy (DRPLA)    | hsa05050 |  |  |  |  |  |  |  | WWP2, CASP7, WWP1, RERE                                                                                                                                                             |
| Melanogenesis                                | hsa04916 |  |  |  |  |  |  |  | CAMK2D, GNAI2, LEF1, DVL3, FZD5, EDNRB, GNAI3, ADCY1, FZD8, KRAS, FZD3, MITF, MAPK1, ADCY9, PLCB1, FZD4, CREB3L2                                                                    |
| Fatty acid elongation in mitochondria        | hsa00062 |  |  |  |  |  |  |  | HADH, ACAA2, HADHA                                                                                                                                                                  |
| Parkinson's disease                          | hsa05020 |  |  |  |  |  |  |  | UBE2G2, UBE2G1, SNCA, UBE2L3, STX1A                                                                                                                                                 |

|                                              |          |  |  |  |  |  |  |  |                                                                                                                                                                                                                                                 |
|----------------------------------------------|----------|--|--|--|--|--|--|--|-------------------------------------------------------------------------------------------------------------------------------------------------------------------------------------------------------------------------------------------------|
| Melanoma                                     | hsa05218 |  |  |  |  |  |  |  | PIK3CA, E2F3, PDGFRA, IGF1R, MET, KRAS, FGF9, MITF, MAPK1, FGF7, AKT2, IGF1, PIK3R3                                                                                                                                                             |
| Cell adhesion molecules (CAMs)               | hsa04514 |  |  |  |  |  |  |  | MPZL1, NRCAM, ITGB1, CDH2, VCAN, SDC4, NEGR1, ITGB8, CNTNAP2, NFASC, NEO1, CLDN11, SPN, ALCAM, PVRL2, CADM1, ITGAV, CNTN1, CD28, NRXN3                                                                                                          |
| Basal cell carcinoma                         | hsa05217 |  |  |  |  |  |  |  | AXIN1, LEF1, DVL3, FZD5, GLI3, FZD8, FZD3, APC, FZD4, BMP4                                                                                                                                                                                      |
| Notch signaling pathway                      | hsa04330 |  |  |  |  |  |  |  | NUMB, DVL3, NOTCH2, DLL1, ADAM17, JAG1, JAG2, CTBP2                                                                                                                                                                                             |
| VEGF signaling pathway                       | hsa04370 |  |  |  |  |  |  |  | PIK3CA, KRAS, SPHK1, PTGS2, MAPK1, SRC, NFATC1, PPP3CA, AKT2, MAPK14, NFAT5, PIK3R3                                                                                                                                                             |
| Gap junction                                 | hsa04540 |  |  |  |  |  |  |  | GNAI2, PDGFRA, GNAI3, ADCY1, SOS2, KRAS, HTR2C, SOS1, ITPR3, MAPK1, SRC, MAPK7, GRB2, ADCY9, PLCB1                                                                                                                                              |
| Cholera - Infection                          | hsa05110 |  |  |  |  |  |  |  | ATP6V1C1, ATP6V0E1, ATP6V1C2, ATP6V1A, ADCY9, ATP6V0A2, ATP6V0D2                                                                                                                                                                                |
| MAPK signaling pathway                       | hsa04010 |  |  |  |  |  |  |  | RPS6KA1, RASGRP2, PDGFRA, EVI1, TGFBR1, NFKB1, MAP3K1, SOS2, KRAS, CACNB2, BDNF, NR4A1, STK4, MAP2K4, RPS6KA4, SOS1, FGF9, MAP3K3, PAK1, MAPK1, MAPK7, FGF7, GRB2, MAP2K7, PPP3CA, AKT2, DUSP3, MAPK14, PTPRR, RPS6KA3, RRAS, MAP2K1IP1, CACNB3 |
| Glutamate metabolism                         | hsa00251 |  |  |  |  |  |  |  | GFPT1, GPT2, GLS, GFPT2, CPS1                                                                                                                                                                                                                   |
| Neurodegenerative Diseases                   | hsa01510 |  |  |  |  |  |  |  | VAPB, SNCA, CASP7, FBXW7, GRB2, BCL2L1                                                                                                                                                                                                          |
| Maturity onset diabetes of the young         | hsa04950 |  |  |  |  |  |  |  | NEUROD1, PAX6, NKX2-2, HNF4G                                                                                                                                                                                                                    |
| Ether lipid metabolism                       | hsa00565 |  |  |  |  |  |  |  | AGPAT3, ENPP6, LYCAT, PAFAH1B1                                                                                                                                                                                                                  |
| Pathogenic Escherichia coli infection - EHEC | hsa05130 |  |  |  |  |  |  |  | NCK2, ITGB1, ROCK1, WASL, YWHAQ, YWHAZ                                                                                                                                                                                                          |
| Pathogenic Escherichia coli infection - EPEC | hsa05131 |  |  |  |  |  |  |  | NCK2, ITGB1, ROCK1, WASL, YWHAQ, YWHAZ                                                                                                                                                                                                          |

The miRNA targets were predicted using TargetScan-5 and assigned to KEGG pathways using the tools at DIANA LAB web site (<http://diana.cslab.ece.ntua.gr/>). The table includes the pathways that were significantly overrepresented among the predicted targets of the indicated miRNAs, as well as the individual members of those pathways, which are predicted targets of one or more miRNAs. The cells are color-coded according to the statistical significance of enrichment of a given pathway among the targets of the indicated miRNA:

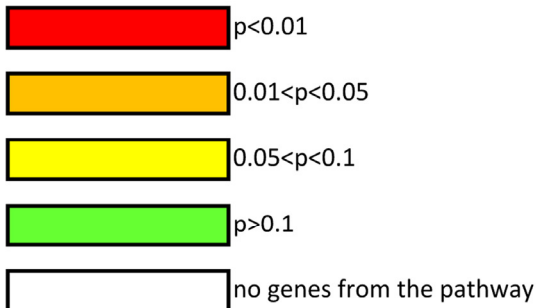

Supplement: aging-05-347-s001.pdf [file aging-05-347-s001.pdf]
